# Supplementary material for: Cyto-Histological Profile of MicroRNAs as Diagnostic Biomarkers in Differentiated Thyroid Carcinomas
Source: MDPI journal article supplement (doi:10.3390/genes15030389), 2024-03-21
Supplement: s1 [file s1]

Supplementary Table S1. Series composition for miRNA analysis.

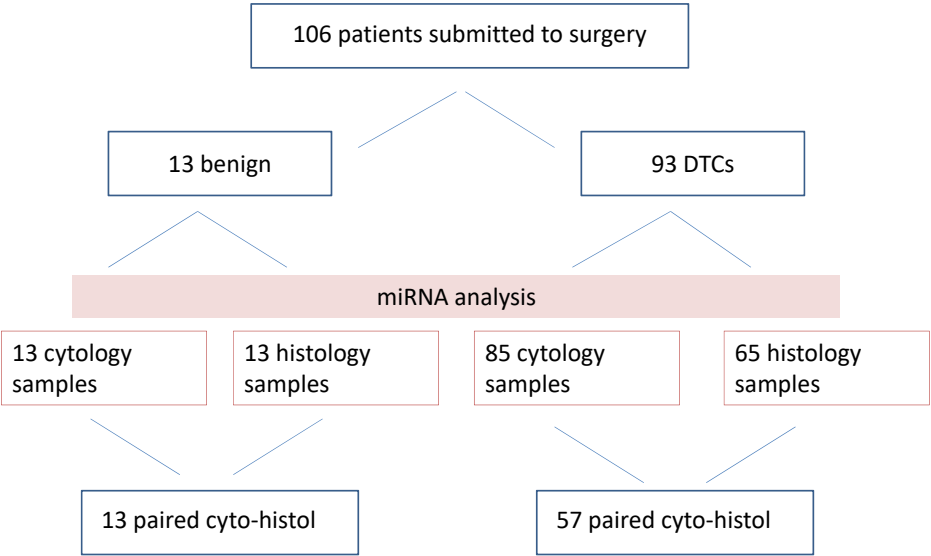

Supplementary Table 1. Series composition for miRNA analysis

Supplementary Table S2. MiRNAs expression in cytology samples by Bethesda categories in all series.

| miRNAs in cytology | By Bethesda categories |          |         |                |                  |
|--------------------|------------------------|----------|---------|----------------|------------------|
|                    | n                      | Cytology | Median* | P25 - P75*     | Min - Max value* |
| miRNA146           | 96                     |          |         |                |                  |
|                    | 03                     | ND       | 0.005   | 0.000 - 0.000  | 0.000 –0.21      |
|                    | 20                     | Benign   | 0.161   | 0.071 – 1.339  | 0.000 – 853.8    |
|                    | 47                     | AUS + FN | 0.756   | 0.079 – 7.395  | 0.000 – 1768,34  |
|                    | 26                     | SM+ M    | 1.275   | 0.004 – 138.81 | 0.000 – 1627.93  |
| miRNA221           | 97                     |          |         |                |                  |
|                    | 03                     | ND       | 0.062   | 0.000 – 0.000  | 0.000 –0.081     |
|                    | 20                     | Benign   | 0.237   | 0.062 – 1.802  | 0.000 – 11.033   |
|                    | 48                     | AUS + FN | 0.169   | 0.043 – 1.095  | 0.000 – 51.976   |
|                    | 26                     | SM+ M    | 0.400   | 0.000 – 8.265  | 0.000 – 24.626   |
| miRNA222           | 91                     |          |         |                |                  |
|                    | 03                     | ND       | 0.903   | 0.000 –0.000   | 0.000 –1.501     |
|                    | 18                     | Benign   | 1.951   | 0.830 –5.545   | 0.000 – 1120.686 |
|                    | 44                     | AUS + FN | 1.045   | 0.343 – 14.592 | 0.000 – 2604.770 |
|                    | 26                     | SM+ M    | 7.581   | .004 – 121.022 | 0.000 – 1111.663 |
| miRNA15a           | 98                     |          |         |                |                  |
|                    | 03                     | ND       | 0.412   | 0.000 –0.000   | 0.000 – 0.772    |
|                    | 21                     | Benign   | 0.745   | 0.408 – 1.148  | 0.000 – 7.390    |
|                    | 48                     | AUS + FN | 1.198   | 0.475 – 4.772  | 0.000 – 47.341   |
|                    | 26                     | SM+ M    | 0.691   | 0.000 – 2.629  | 0.000 – 7.831    |

\* The 2- $\Delta\Delta$ CT method was used to quantification of miRNA expression normalized to miR-16.

Legend: ND: Non-diagnostic, AUS: Atypia of Undetermined Significance, FN: Follicular Neoplasm, SM: Suspicious for malignancy and M: Malignant. P25-75: percentile 25 and percentile 75. Max-Min: maximum and minimum value.

| MiRNAs<br>expression in<br>cytology | Histology diagnosis |                    |         |                |                  |         |
|-------------------------------------|---------------------|--------------------|---------|----------------|------------------|---------|
|                                     | n                   | Final<br>Diagnosis | Median* | P25 - P75*     | min - max value* | p-value |
| miRNA146                            | 96                  |                    |         |                |                  | 0.895   |
|                                     | 11                  | Benign             | 0.308   | 0.141 - 1.530  | 0.086 - 4.394    |         |
|                                     | 85                  | Malignant          | 0.489   | 0.045 - 16.80  | 0.000 - 1768.34  |         |
| miRNA221                            | 97                  |                    |         |                |                  | 0.169   |
|                                     | 11                  | Benign             | 0.535   | 0.155 - 2.351  | 0.035 - 5.242    |         |
|                                     | 86                  | Malignant          | 0.172   | 0.039 - 2.636  | 0.000 - 51.976   |         |
| miRNA222                            | 97                  |                    |         |                |                  | 0.402   |
|                                     | 11                  | Benign             | 0.914   | 0.506 - 2.493  | 0.089 - 6.358    |         |
|                                     | 86                  | Malignant          | 1.460   | 0.330 - 32.199 | 0.000 - 2604,77  |         |
| miRNA15a                            | 98                  |                    |         |                |                  | 0.402   |
|                                     | 11                  | Benign             | 1.053   | 0.745 - 4.349  | 0.016 - 7.390    |         |

Supplementary Table S3. MiRNAs expression in cytology samples by histology diagnosis in all series.

|  |    |           |       |               |                |  |
|--|----|-----------|-------|---------------|----------------|--|
|  | 87 | Malignant | 0.686 | 0.415 – 2.999 | 0.000 - 47.341 |  |
|--|----|-----------|-------|---------------|----------------|--|

\* The 2- $\Delta\Delta$ CT method was used to quantification of miRNA expression normalized to miR-16.

Legend: P25-75: percentile 25 and percentile 75. Max-min: maximum and minimum value

Supplementary Table S4. Five highest extreme frequencies of miRNAs expression in cytology samples by histology diagnosis in all series.

| Histology diagnosis | Highest values of miRNAs expression* in cytology |           |           |           |
|---------------------|--------------------------------------------------|-----------|-----------|-----------|
|                     | miRNA-146                                        | miRNA-221 | miRNA-222 | miRNA-15a |
| Benign              | 4.394                                            | 5.242     | 6.358     | 7.390     |
|                     | 2.881                                            | 3.978     | 3.139     | 5.620     |
|                     | 1.529                                            | 2.351     | 1.846     | 4.349     |
|                     | 0.770                                            | 1.401     | 1.384     | 1.242     |
|                     | 0.610                                            | 0.677     | 0.914     | 1.193     |
| Malignant           | 1768.341                                         | 51.976    | 2604.770  | 47.341    |
|                     | 1627.930                                         | 48.630    | 1120.686  | 11.342    |
|                     | 1121.931                                         | 24.626    | 1112.533  | 10.989    |
|                     | 1041.914                                         | 16.130    | 1111.663  | 9.556     |
|                     | 958.423                                          | 11.653    | 1106.747  | 9.486     |

\* The 2- $\Delta\Delta$ CT method was used to quantification of miRNA expression normalized to miR-16.

Supplementary Table S5. MiRNAs expression in histology within histological subtypes in all series.

| miRNAs in histology*<br>n=106                            | Histological subtypes                           |                    |                                                 |                                                         |                                                  |                                             |
|----------------------------------------------------------|-------------------------------------------------|--------------------|-------------------------------------------------|---------------------------------------------------------|--------------------------------------------------|---------------------------------------------|
|                                                          | Benign<br>n=13                                  | WDT-UMP<br>n=2     | NIFT<br>n=4                                     | PTC<br>n=81                                             | FTC<br>n=4                                       | HCC<br>n=2                                  |
| miRNA-146<br>n= 60<br>Median*<br>P25-P75*<br>Min – Max * | n=8<br>0.66<br>0.392 – 2.456<br>0.322 – 5.341   | n=1<br>-<br>-<br>- | n=2<br>0.226<br>0.142 – 0.<br>0.142 – 0.310     | n=46<br>65.667<br>8.351 – 1316.098<br>0.016 – 27755.752 | n=2<br>0.227 – 0.<br>0.025 – 0.<br>0.025 – 0.428 | n=1<br>-<br>-<br>-                          |
| miRNA-221<br>n= 76<br>Median*<br>P25-P75*<br>Min – Max*  | n=10<br>1.312<br>0.781 – 1.798<br>0.192 – 4.395 | n=1<br>-<br>-<br>- | n=4<br>1.918<br>0.385 – 4.092<br>0.012 – 4.678  | n=57<br>5.45<br>1.582 – 10.900<br>0.368 – 63.304        | n=2<br>0.115<br>0.108 – 0.<br>0.108 – 0.124      | n=2<br>6.278<br>3.297 – 0.<br>3.297 – 9.260 |
| miRNA-222<br>n= 78<br>Median*<br>P25-P75*<br>Min – Max*  | n=10<br>1.067<br>0.645 – 2.544<br>0.328 – 4.348 | n=1<br>-<br>-<br>- | n=4<br>2.465<br>0.626 – 9.693<br>0.271 – 11.843 | n=59<br>3.511<br>1.183 – 13.315<br>0.115 – 3006.7       | n=2<br>0.134<br>0.124 – 0.<br>0.124 – 0.143      | n=2<br>16.21<br>7.7 – 0.<br>7.7 – 0. 24.72  |
| miRNA-15a<br>n= 77<br>Median*<br>P25-P75*<br>Min – Max*  | n=10<br>0.683<br>0.510 – 1.610<br>0.282 – 2.514 | n=1<br>-<br>-<br>- | n=4<br>1.020<br>0.835 – 2.177<br>0.779 – 2.556  | n=58<br>2.682<br>1.396 – 37.388<br>0.479 – 99.641       | n=2<br>1.594<br>1.439 – 0.<br>1.439 – 1.747      | n=2<br>0.236<br>0.231 – 0.<br>0.231 – 0.241 |

\* The 2- $\Delta\Delta$ CT method was used to quantification of miRNA expression normalized to miR-16.

Legend: WDT-UMP: Well differentiated thyroid tumor of uncertain malignant potential; NIFT: noninvasive follicular thyroid neoplasm with papillary-like nuclear features; PTC: papillary thyroid carcinoma; FTC: follicular thyroid carcinoma; HCC: Hürthle cell carcinoma: not available data to estimate summary measures. P25-75: percentile 25 and percentile 75. Max-min: maximum and minimum value

Supplementary Table S6. Association of the miRNAs expression levels and the presence of genetic mutations in cytology samples in PTCs.

| Genetic mutations in Cytology | miRNAs in Cytology |         |           |         |           |         |           |         |
|-------------------------------|--------------------|---------|-----------|---------|-----------|---------|-----------|---------|
|                               | miRNA-146          |         | miRNA-221 |         | miRNA-222 |         | miRNA-15a |         |
|                               | n                  | Median* | n         | Median* | n         | Median* | n         | Median* |
| <i>TERTp</i>                  | 84                 |         | 85        |         | 80        |         | 86        |         |
| Absent                        | 74                 | 0.619   | 75        | 0.247   | 70        | 1.460   | 76        | 0.765   |
| Present                       | 10                 | 0.880   | 10        | 0.170   | 10        | 0.963   | 10        | 2.044   |
| p-value                       |                    | 0.730   |           | 0.754   |           | 0.391   |           | 0.609   |
| <i>BRAF</i>                   | 84                 |         | 85        |         | 80        |         | 86        |         |
| Absent                        | 62                 | 0.619   | 63        | 0.198   | 58        | 1.133   | 64        | 1.123   |
| Present                       | 22                 | 0.905   | 22        | 0.341   | 22        | 3.709   | 22        | 0.589   |
| p-value                       |                    | 0.555   |           | 0.779   |           | 0.338   |           | 0.135   |
| <i>RAS</i>                    | 83                 |         | 84        |         | 79        |         | 86        |         |
| Absent                        | 64                 | 0.696   | 65        | 0.266   | 61        | 1.420   | 66        | 0.801   |
| Present                       | 19                 | 0.219   | 19        | 0.191   | 18        | 1.010   | 19        | 1.204   |
| p-value                       |                    | 0.193   |           | 0.096   |           | 0.082   |           | 0.792   |

\* The 2- $\Delta\Delta$ CT method was used to quantification of miRNA expression normalized to miR-16.

Legend: *TERTp*: telomerase reverse transcriptase promoter; *BRAF*: B-Raf proto-oncogene, serine/threonine kinase; *NRAS*: NRAS proto-oncogene, GTPase; *HRAS*: HRas proto-oncogene, GTPase, and *KRAS*—*KRAS* proto-oncogene, GTPase.

Supplementary Table S7. A. Associations between miR-146b expression and clinicopathological features in Papillary Thyroid Carcinomas.

| miR-146b and clinicopathological characteristics n =54 (100%)      | Median*           | P25 - P75*                           | Min - Max value*                       | p-value      |
|--------------------------------------------------------------------|-------------------|--------------------------------------|----------------------------------------|--------------|
| Mean tumor size (SD) (mm) (n=54)                                   | -                 | -                                    | -                                      | 0.179        |
| Extra thyroidal extension<br>Absent 42 (77.8)<br>Present 12 (22.2) | 27.227<br>147.041 | 3.127 - 389.557<br>3.333 - 1402.208  | 0.016 - 6476.520<br>0.473 - 27755.768  | 0.318        |
| Capsule invasion<br>Absent 29 (53.7)<br>Present 25 (46.3)          | 8.733<br>126.683  | 1.131 - 119.808<br>20.400 - 1377.380 | 0.016 - 5276.991<br>0.473 - 27755.768  | <b>0.011</b> |
| Vascular invasion<br>Absent 45 (83.3)<br>Present 9 (16.7)          | 27.945<br>95.902  | 3.119 - 448.500<br>13.774 - 2771.874 | 0.016 - 6476.520<br>0.473 - 27755.768  | 0.270        |
| Lymphatic invasion<br>Absent 48 (88.9)<br>Present 6 (11.1)         | 29.856<br>732.253 | 3.215 - 532.402<br>1.215 - 10022.989 | 0.016 - 6476.520<br>0.473 - 27755.768  | 0.475        |
| Psammoma bodies<br>Absent 47 (87)<br>Present 7 (13)                | 22.303<br>160.507 | 3.006 - 616.304<br>61.201 - 5276.991 | 0.016 - 6476.520<br>32.819 - 27755.768 | <b>0.019</b> |
| Calcifications<br>Absent 43 (79.6)<br>Present 11 (20.4)            | 22.303<br>160.507 | 2.725 - 280.695<br>32.819 - 5276.991 | 0.016 - 5268.565<br>7.207 - 27755.768  | <b>0.010</b> |
| Lymph node metastases<br>Absent 49 (90.7)<br>Present 05 (9.3)      | 32.819<br>3.070   | 3.740 - 843.629<br>0.968 - 746.444   | 0.016 - 27755.768<br>0.473 - 1431.686  | 0.350        |

\* The 2- $\Delta\Delta$ CT method was used to quantification of miRNA expression normalized to miR-16.

Legend: P25-75: percentile 25 and percentile 75. Max-min: maximum and minimum value.



Supplementary Table S7. B. Associations between miR-221 expression and clinicopathological features in Papillary Thyroid Carcinomas.

| miR-221 and clinicopathological characteristics n =67 (100%)       | Median*         | P25 - P75*                       | Min - Max value*                  | p-value          |
|--------------------------------------------------------------------|-----------------|----------------------------------|-----------------------------------|------------------|
| Mean tumor size (SD) (mm)<br>n =67                                 | -               | -                                | -                                 | 0.817            |
| Extra thyroidal extension<br>Absent 54 (80.6)<br>Present 13 (19.4) | 2.727<br>7.786  | 1.034 - 9.257<br>2.223 - 14.415  | 0.192 - 36.928<br>1.545 - 63.304  | 0.078            |
| Capsule invasion<br>Absent 39 (58.2)<br>Present 28 (41.8)          | 1,618<br>8.064  | 0.878 - 6.802<br>2.855 - 15.441  | 0.192 - 18.908<br>0.368 - 63.304  | <b>&lt;0.001</b> |
| Vascular invasion<br>Absent 56 (83.6)<br>Present 11 (16.4)         | 2.355<br>12.518 | 1.068 - 8,065<br>5.452 - 23,279  | 0.192 - 34.725<br>2.342 - 2.342   | <b>&lt;0.001</b> |
| Lymphatic invasion<br>Absent 60 (89.6)<br>Present 7 (10.4)         | 2.900<br>16.415 | 1.240 - 1240<br>1.820 - 23.279   | 0.192 - 36.928<br>0.368 - 63.304  | 0.078            |
| Oncocytic component<br>Absent 58 (86.6)<br>Present 9 (13.4)        | 2.342<br>12.414 | 1.070 - 7.972<br>8,283 - 28.598  | 3.006 - 616.304<br>5.452 - 63.304 | <b>0.002</b>     |
| Calcifications<br>Absent 54 (80.6)<br>Present 13 (19.4)            | 2.403<br>8.224  | 1.072 - 8.126<br>3.376 - 16.974  | 0.192 - 63.304<br>0.368 - 23.279  | <b>0.031</b>     |
| Lymph node metastases<br>Absent 61 (91)<br>Present 06 (9)          | 3.190<br>5.413  | 1.145 - 10.018<br>1,751 - 11.378 | 0.192 - 63.304<br>1.545 - 17.532  | 0.499            |

\* The 2- $\Delta\Delta$ CT method was used to quantification of miRNA expression normalized to miR-16.

Legend: P25-75: percentile 25 and percentile 75. Max-min: maximum and minimum value

Supplementary Table S7.C. Associations between miR-222 expression and clinicopathological features in Papillary Thyroid Carcinomas.

| miR-222 and clinicopathological characteristics n =69 (100%)       | Median*         | P25 - P75*                      | Min - Max value*                   | p-value          |
|--------------------------------------------------------------------|-----------------|---------------------------------|------------------------------------|------------------|
| Mean tumor size (SD) (mm) (n=69)                                   | -               | -                               | -                                  | 0.253            |
| Extra thyroidal extension<br>Absent 56 (81.2)<br>Present 13 (18.8) | 2.210<br>14.006 | 0.870 - 5.603<br>4.238 - 36.416 | 0.114 - 43,231<br>0.908 - 3006.772 | <b>&lt;0.001</b> |
| Capsule invasion<br>Absent 39 (56.5)<br>Present 30 (43.5)          | 1.669<br>5.284  | 0.717 - 4.347<br>2.014 - 14.113 | 0.114 - 68.403<br>0.861 - 3006.772 | <b>0.005</b>     |
| Vascular invasion<br>Absent 57 (82.6)<br>Present 12 (17.4)         | 2.222<br>10.575 | 0.879 - 4.806<br>7.220 - 38.986 | 0.114 - 68,403<br>1.392 - 3006.772 | <b>&lt;0.001</b> |
| Lymphatic invasion<br>Absent 61 (88.4)<br>Present 8 (11.6)         | 2.325<br>8.172  | 0.902 - 8.224<br>3.840 - 36.370 | 0.114 - 68.403<br>1.392 - 3006.772 | <b>0.020</b>     |
| Psammoma bodies<br>Absent 58 (84)<br>Present 11 (16)               | 2.251<br>8.230  | 0.888 - 7.806<br>3.465 - 15.210 | 0.114 - 68.403<br>1,392 - 3006.772 | <b>0.010</b>     |
| Calcifications<br>Absent 55 (79.7)<br>Present 14 (20.3)            | 2.222<br>7.949  | 0.861 - 5.921<br>3.102 - 19.672 | 0.114 - 68,403<br>1.392 - 3006.772 | <b>0.006</b>     |
| Oncocytic component<br>Absent 50 (72.5)<br>Present 19 (27.5)       | 1.775<br>13.211 | 0.843 - 6.496<br>3.673 - 32.168 | 0.114 - 3006,772<br>2,222 - 41.556 | <b>0.008</b>     |
| Inflammatory infiltrate<br>Absent 50 (72.5)<br>Present 19 (27.5)   | 2.040<br>4.965  | 0.888 - 7.806<br>3.354 - 16.633 | 0.114 - 68.403<br>0.429 - 3006.772 | <b>0.019</b>     |
| Tall cells<br>Absent 59 (85.5)<br>Present 10 (14.5)                | 2.222<br>8.230  | 0.897 - 8.219<br>4.055 - 36.352 | 0.114 - 68,403<br>3.354 - 3006.772 | <b>0.017</b>     |
| Focality<br>Unifocal 40 (58)<br>Multifocal 29 (42)                 | 3.200<br>7.070  | 1.000 - 7.669<br>1.475 - 27.044 | 0.114 - 68.403<br>0.196 - 3006.772 | <b>0.049</b>     |
| Lymph node metastases<br>Absent 62 (89.9)<br>Present 07 (10.1)     | 3.093<br>4.965  | 0.951 - 12.659<br>1.392 - 8.675 | 0.114 - 3006.772<br>0.908 - 41.556 | 0.330            |

\* The 2- $\Delta\Delta$ CT method was used to quantification of miRNA expression normalized to miR-16.

Legend: P25-75: percentile 25 and percentile 75. Max-min: maximum and minimum value.

Supplementary Table S7. D. Associations between miR-15a expression and clinicopathological features in Papillary Thyroid Carcinomas.

| miR-15a and clinicopathological characteristics n =68 (100%)       | Median*         | P25 - P75*                       | Min - Max value*                 | p-value      |
|--------------------------------------------------------------------|-----------------|----------------------------------|----------------------------------|--------------|
| Mean tumor size (SD) (mm) (n=68)                                   | -               | -                                | -                                | 0.649        |
| Extra thyroidal extension<br>Absent 56 (82.4)<br>Present 12 (17.6) | 2.210<br>1.333  | 1.309 - 37.281<br>1.194 - 3.570  | 0.282 - 99.640<br>0.847- 52.086  | 0.182        |
| Capsule invasion<br>Absent 39 (57.4)<br>Present 29 (42.6)          | 1.577<br>19.882 | 0.881 - 4.089<br>1.527- 41.928   | 0.282 - 81,366<br>0.712 - 99.640 | <b>0.006</b> |
| Focality<br>Unifocal 39 (57.4)<br>Multifocal 29 (42.6)             | 1.867<br>2.561  | 1.249 - 37.278<br>1.745 - 38.385 | 0.473 - 99.640<br>0.712 - 55.047 | <b>0.041</b> |
| Lymph node metastases<br>Absent 61 (89.7)<br>Present 07 (10.3)     | 2.475<br>1.374  | 1.263 - 37.257<br>0.935 - 19.882 | 0.282 - 99.640<br>0.847 - 37.705 | 0.380        |

\* The 2- $\Delta\Delta$ CT method was used to quantification of miRNA expression normalized to miR-16.

Legend: P25-75: percentile 25 and percentile 75. Max-min: maximum and minimum value
